# Supplementary material for: Engineering hemoglobin to enable homogenous PEGylation without modifying protein functionality
Source: Royal Society of Chemistry journal article supplement (doi:10.1039/c9bm01773a), 2020-01-01
Supplement: c9bm01773a1.pdf [file c9bm01773a1.pdf]

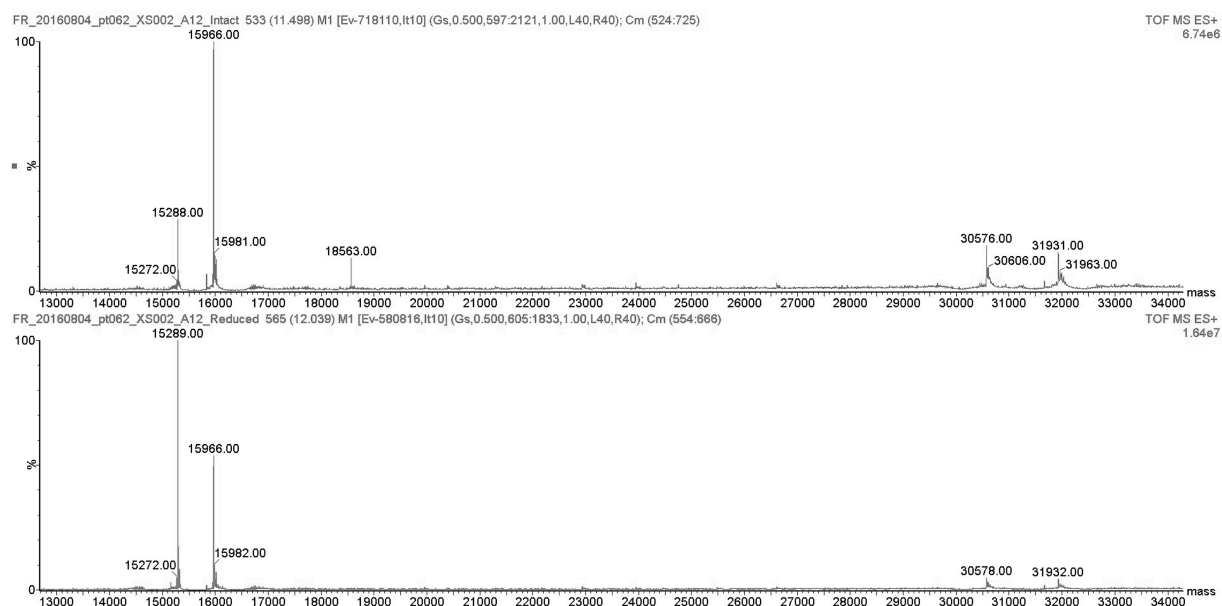

**Figure S1 LC-MS Q-TOF of A12 mutant pre and post DTT treatment**  
Purified A12 Hb pre (top) and post (bottom) DTT treatment. For conditions see Materials and Methods. Note that the theoretical mass of the Hb subunits (with uncleaved N-terminal methionine) is  $\alpha$ -subunit = 15289 Da and  $\beta$ -subunit = 15966 Da.

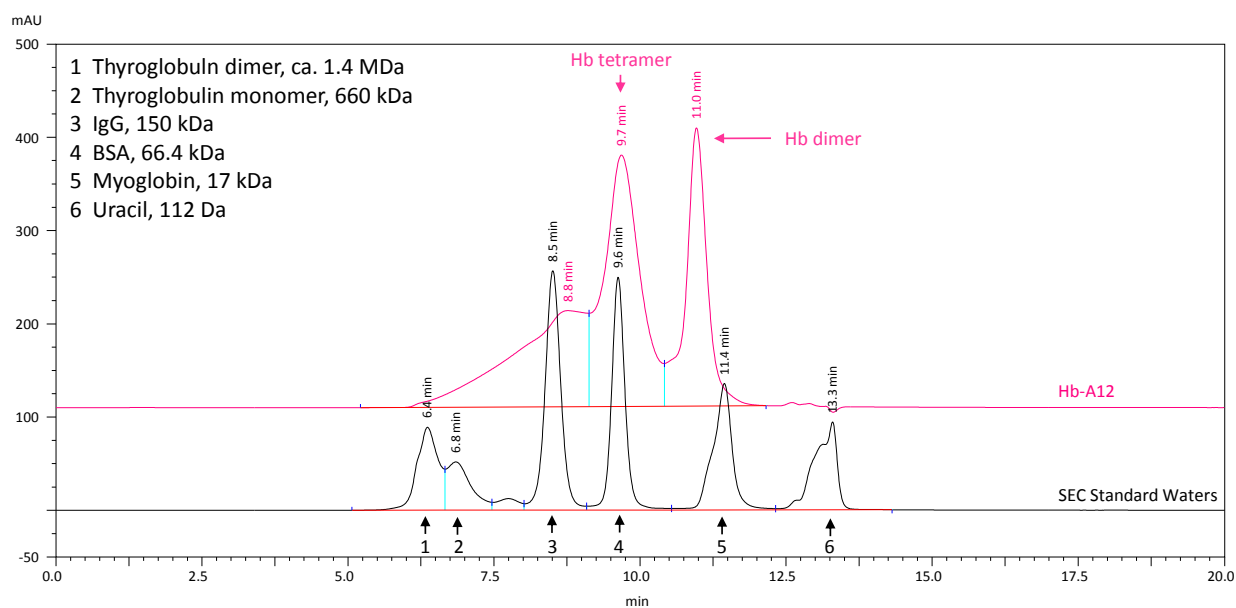

## Figure S2 SEC of A12 versus SEC standards

For conditions see Materials and Methods. Note that compared to Figure 4, this particular sample retains some larger molecular weight contaminants

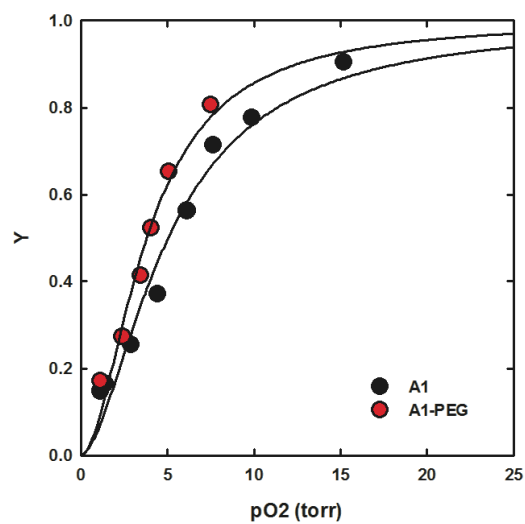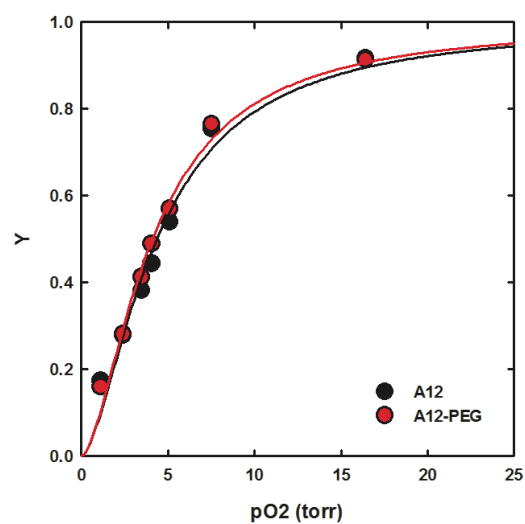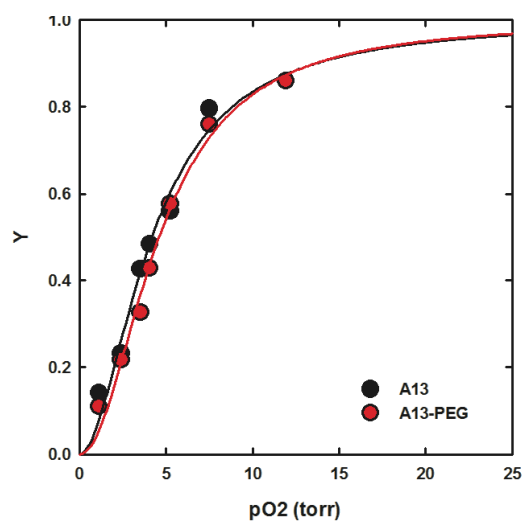

**Figure S3 Oxygen equilibrium binding curves**

Curve fit values presented in Table 1. For conditions see Materials and Methods.

A1

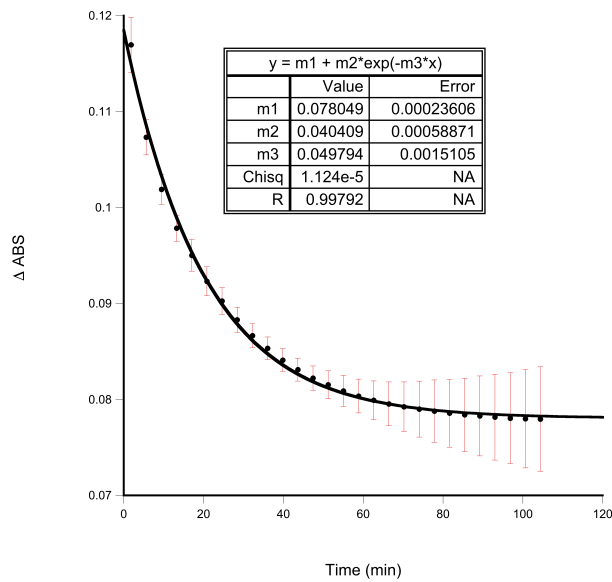

A12

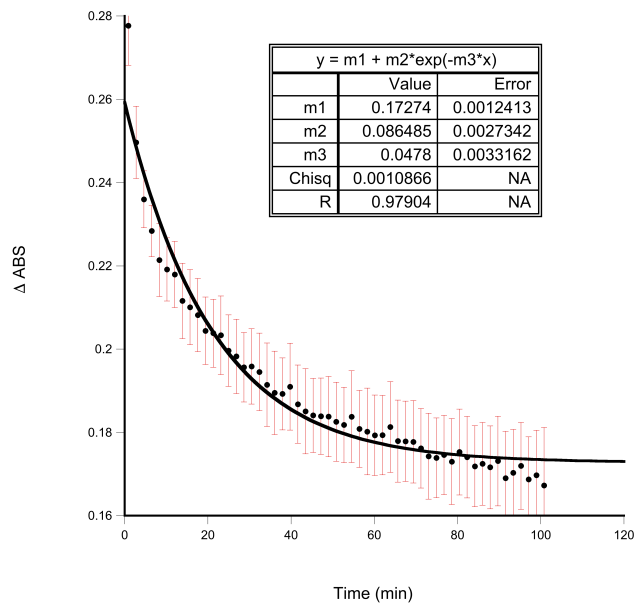

A12-PEG

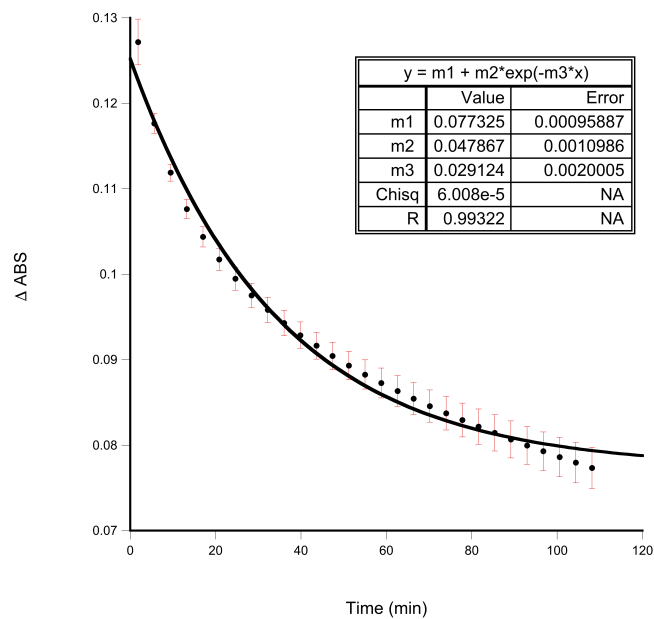

## Figure S4 Time course of autoxidation of oxyHb

For conditions see Materials and Methods. Data plotted are means  $\pm$  SD for six measurements. Curve fits are non linear regression to single exponential decay. Note that for ease of presentation, the curve fits represented here are single fits  $\pm$  SEM to the mean of the six averaged time courses, whereas those in Table 2 are the mean  $\pm$  SD of the calculated fits to the six individual time courses. However, any differences in values for these two methods were trivial.

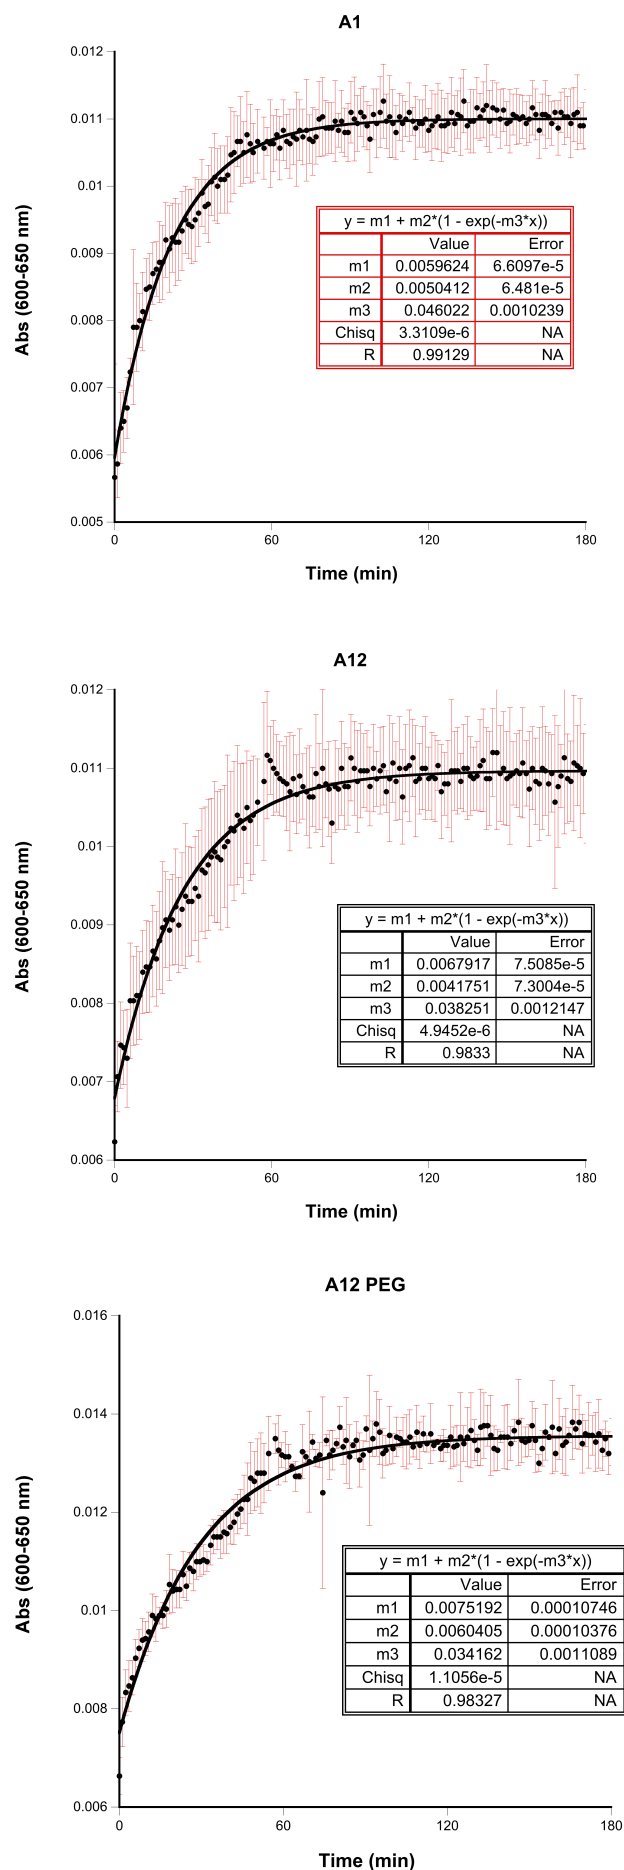

## Figure S5 Time course of heme dissociation from metHb

For conditions see Materials and Methods. Data plotted are means  $\pm$  SD for 3 measurements. Curve fits are non linear regression to single exponential. Note that for ease of presentation, the curve fits represented here are single fits  $\pm$  SEM to the mean of the three averaged time courses, whereas those in Table 2 are the mean  $\pm$  SD of the calculated fits to the three individual time courses. However, any difference in values for these two methods was trivial.
